# Supplementary material
Source: publisher site journal article supplement (https://www.dovepress.com/article/401725)
Supplement: Supplementary file 1 [file get_supplementary_file.php]

***Supporting Information***

**Polyvinyl Alcohol (PVA)-based Nanoniosome for Enhanced *in vitro* Delivery and Anticancer Activity of Thymol**

Mohammadreza Abdihaji1, **†**, Masoumeh Mirzaei Chegeni2, **†**, Alireza Hadizadeh3,4, Negar Farrokhzad5, Zahra Kheradmand6, Parastoo Fakhrfatemi7, Fardad Faress8, Kasra Moeinabadi-Bidgoli9, Hassan Noorbazargan10, Ebrahim Mostafavi11, 12, *

1Department of Biology, The Center for Genomics and Bioinformatics, Indiana University, Bloomington, Indiana, USA

2Department of Biology, Science and Research branch, Islamic Azad University, Tehran, Iran

3School of Medicine, Tehran University of Medical Sciences, Tehran, Iran

4Research Center for Advanced Technologies in Cardiovascular Medicine, Cardiovascular Diseases Research Center Institute, Tehran University of Medical Sciences, Tehran, Iran

5 Faculty of Biology, Medicine and Health, University of Manchester, Manchester, UK

6 Department of Agriculture, Islamic Azad University Maragheh Branch, Maragheh, Iran

7 Faculty of Pharmacy, Shiraz University of Medical Sciences, Shiraz, Iran

8Department of Business, Data Analysis, The University of Texas Rio Grande Valley (UTRGV) Edinburg, Texas, USA

9Basic and Molecular Epidemiology of Gastroenterology Disorders Research Center, Shahid Beheshti University of Medical Sciences, Tehran, Iran

10Department of Biotechnology, School of Advanced Technologies in Medicine, Shahid Beheshti University of Medical Sciences, Tehran, Iran

11Stanford Cardiovascular Institute, Stanford University School of Medicine, Stanford, CA 94305, USA

12Department of Medicine, Stanford University School of Medicine, Stanford, CA 94305, USA

**†**Mohammadreza Abdihaji, and Masoumeh Mirzaei Chegeni contributed equally to this work

***Correspondence:** [ebimsv@stanford.edu](mailto:ebimsv@stanford.edu); ebi.mostafavi@gmail.com (E. Mostafavi)

**2. Materials and methods**

**2.1. Materials**

Thymol (TH), Span® 60 (sorbitan monostearate) and Vitamin E were purchased from Millipore Sigma (Burlington, MA USA) and used without further purification. Chloroform, methanol, Polyvinyl alcohol (PVA), dimethyl sulfoxide (DMSO), dialysis membrane (MWCO 12,000 Da), sodium dodecyl sulfate (SDS), phosphate-buffered saline (PBS) and Amicon (Ultra-15-Membrane, MWCO 30,000 Da) were acquired from Merck Chemical Co. (Darmstadt, Germany). The MCF-7, AGS, HepG2, and HFF cell lines were purchased from Pasteur Institute Cell Bank (Tehran, Iran). Medium RPMI-1640 (Dulbecco's Adjusted Eagle Medium), formaldehyde, trypsin-EDTA, Trypan blue, fetal bovine serum (FBS), phosphate-buffer, 3-(4,5-dimethylthiazol-2-yl)-2,5-diphenyltetrazolium bromide (MTT) and penicillin/streptomycin (PS) 100 X were acquired from Gibco, ThermoFisher Scientific (Waltham, MA, USA). 1X binding buffer and annexin V-FITC flow cytometry kit was obtained from Affymetrix Biosciences, ThermoFisher Scientific. The RNA Extraction and cDNA Synthesis kits (Cat No. ER101-01 and AE301-02) were purchased from Transgene Biotech Ltd. (Beijing, China). DCFDA/H2DCFDA - Cellular Reactive Oxygen Species (ROS) Assay Kit was obtained from Abcam Company (Cambridge, United Kingdom). Triton™ X-100 and DAPI (4′,6-Diamidino-2-phenylindole dihydrochloride). propidium iodide was purchased from Calbiochem (San Diego, CA, USA).

**2.15. Statistical analysis**

Statistical analysis and curve fitting were performed using GraphPad Prism software version 8(GraphPad Software, Inc., San Diego, CA, USA). Data from three independent experiments were expressed as means ± standard deviations. Statistical significance was determined with a one-way analysis of variance after validating the normality and homoscedasticity of the data sets. For all analyses, statistical significance was pre-set at α = 0.05. Box–Behnken method was performed using Design-Expert software version 10 (Stat-Ease Inc., Minneapolis, MN, USA).

**Table S1.** Different levels for variables in the Box–Behnken design optimization

| Level | -1 | 0 | +1 |
| --- | --- | --- | --- |
| A (Lipid, µmol) | 200 | 250 | 300 |
| B (Hydration time, min) | 30 | 45 | 60 |
| C (Vitamin E: Span 60, molar ratio) | 0.5 | 1 | 2 |

Drug concentration: 1mg/ml, Sonication time:7 min

**Table S2**. Primers and their sequences are used in real-time PCR

| **Gene** | **Forward Primer** | **Reverse Primer** |
| --- | --- | --- |
| *Caspase3* | CATACTCCACAGCACCTGGTTA | ACTCAAATTCTGTTGCCACCTT |
| *Caspase9* | CATATGATCGAGGACATCCAG | TTAGTTCGCAGAAACGAAGC |
| *MMP-2* | TTGACGGTAAGGACGGACTC | CATACTTCACACGGACCACTTG |
| *MMP-9* | GCACGACGTCTTCCAGTACC | CAGGATGTCATAGGTCACGTAGC |
| *CyclinD* | CAGATCATCCGCAAACACGC | AAGTTGTTGGGGCTCCTCAG |
| *CyclinE* | CTCCAGGAAGAGGAAGGCAA | TTGGGTAAACCCGGTCATCA |
| *ß-actin* | TCCTCCTGAGCGCAAGTAC | CCTGCTTGCTGATCCACATCT |

**Table S3.** The optimized responses obtained by Box–Behnken method and the experimental data for the same responses under the optimum conditions.

| **Parameter** | **Predicted by RSM** | **Nio-TH** | **Nio-TH/PVA** | **Vehicle (Nio/PVA)** |
| --- | --- | --- | --- | --- |
| Average size (nm) | 199.747 | 184.17±5.40 | 241.93±6.37 | 132.48±6.52 |
| PDI | 0.228 | 0.178±0.007 | 0.193±0.010 | 0.151±0.005 |
| Entrapment Efficiency (EE) (%) | 73.183 | 75.32±0.59 | 83.64±1.17 | - |
| Zeta potential (mV) | - | -18.35±1.58 | -23.68±1.34 | -29.4±1.25 |


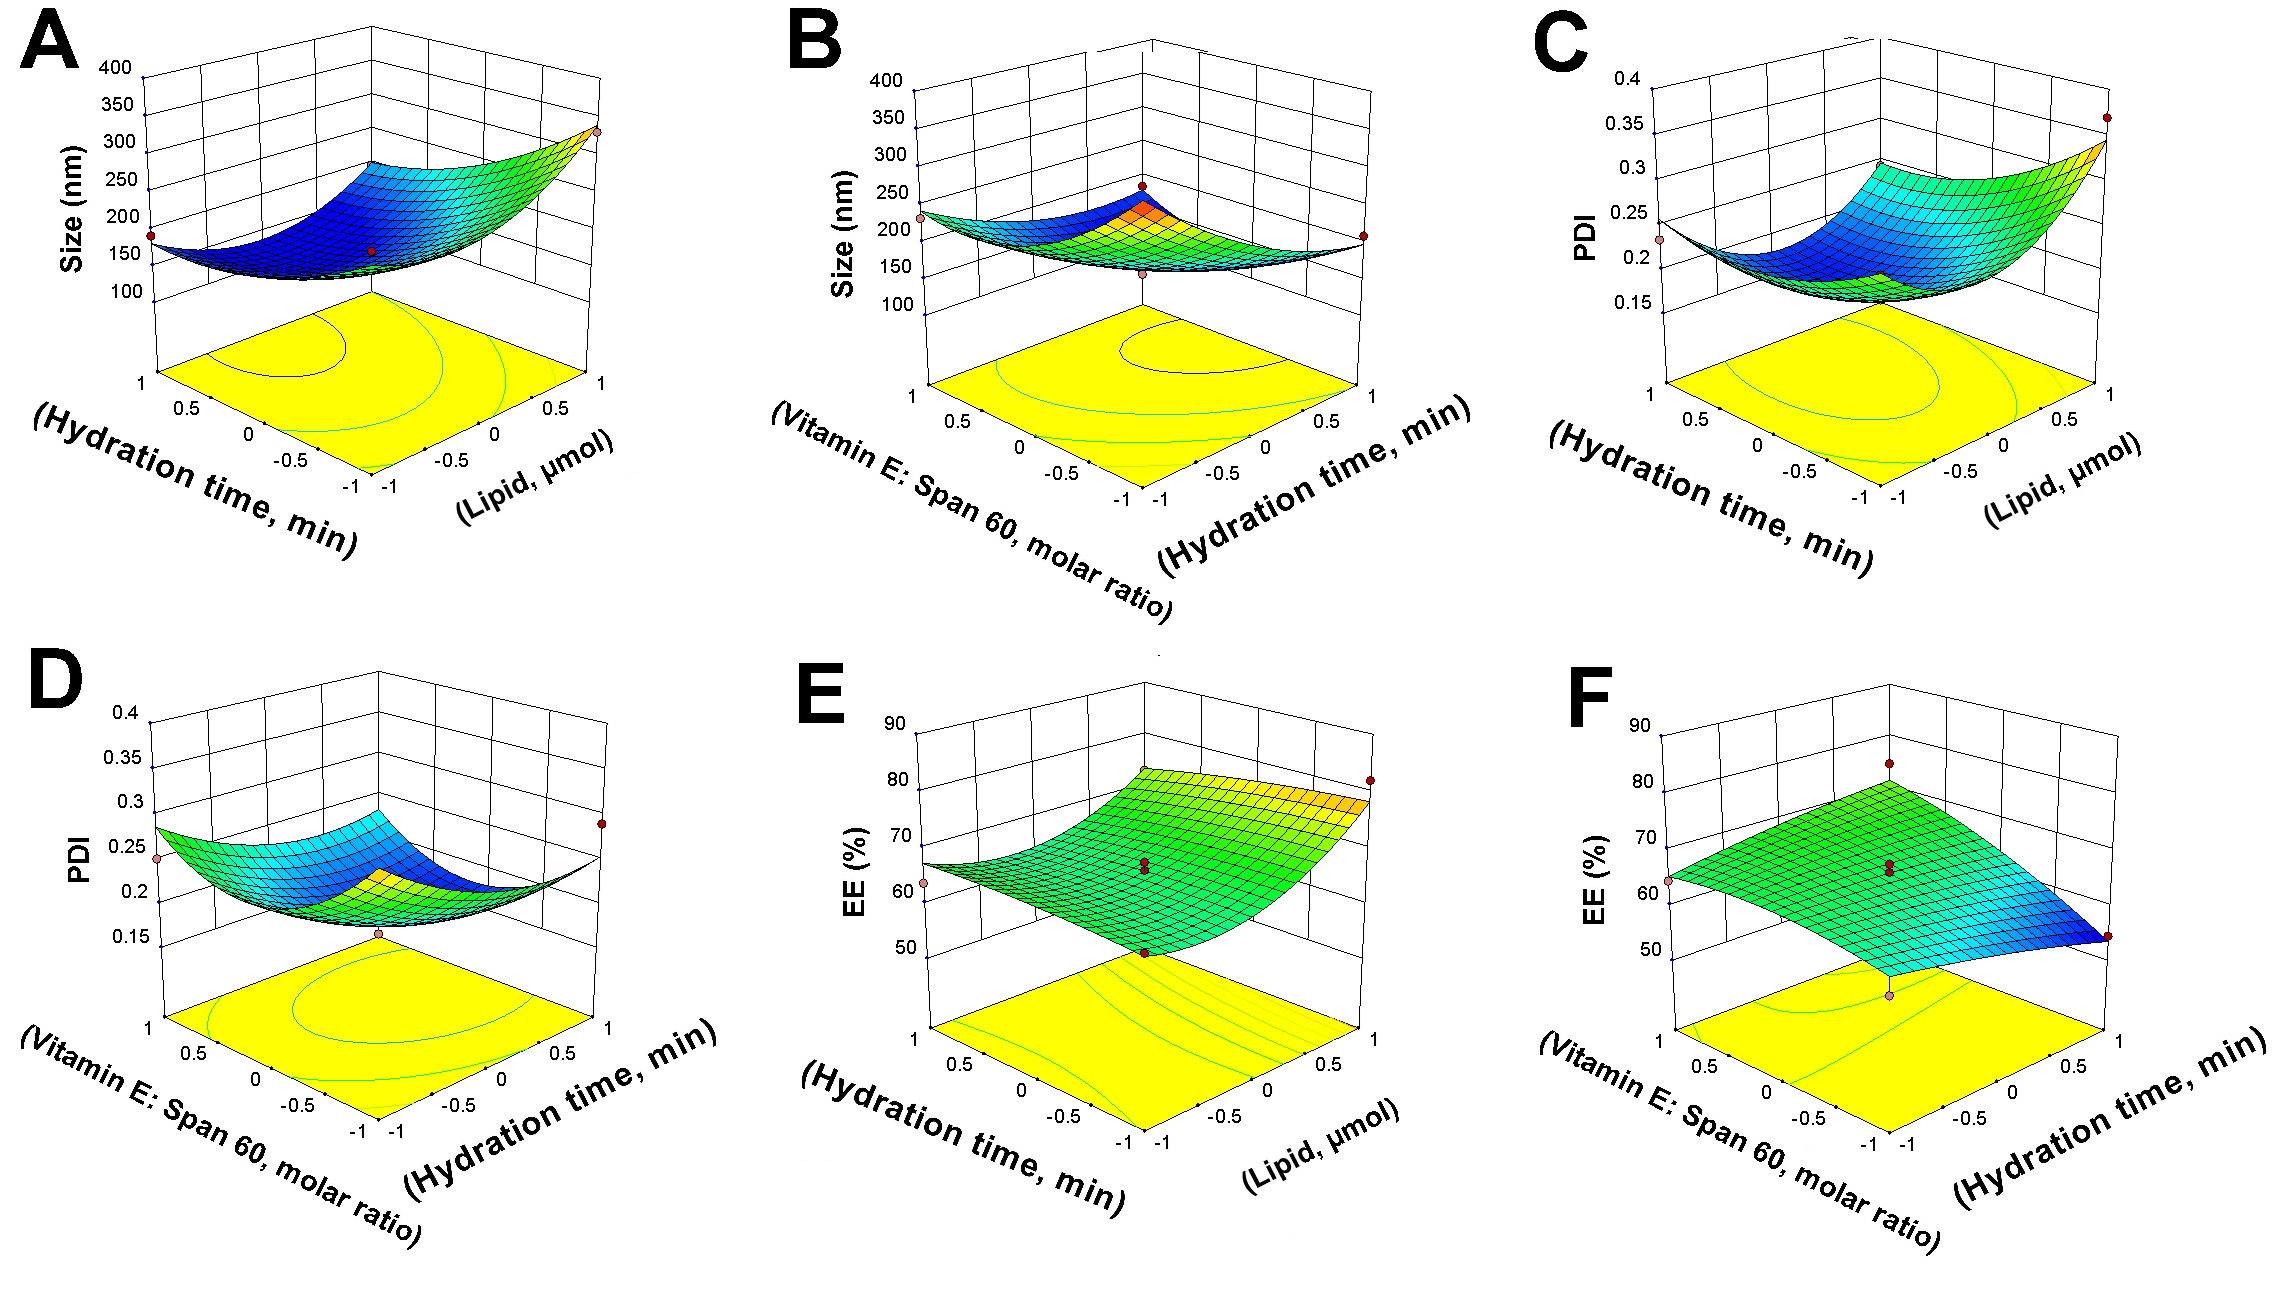


**Figure S1**. **A, B**) Box–Behnken method for average diameter as a function of the parameters; **C, D**) Box–Behnken method for PDI as a function of the parameters; **E, F**) Box–Behnken method for encapsulation efficiency (EE) as a function of the parameters.
